# Supplementary material for: Occupational Exposure and Health Risks Among Traditional Copper Bell Makers in India: A Comprehensive Assessment with Policy and Preventive Implications
Source: Research Square preprint supplement (doi:10.21203/rs.3.rs-7690031/v1), 2025-10-07
Supplement: Supplementary file 1 [file 2b796ceb1aba1395a53ced5e.docx]

**SUPPLEMENTARY TABLES AND FIGURES**

**Supplementary Figure 1: Hourly Variation of Wet-Bulb Globe Temperature (WBGT) In Copper Bell Workshops (Coal-Fired Furnace Units)**

**Supplementary Figure 2: Graphical representation for octave band analysis at Unit 1 in line with standard NC curves**


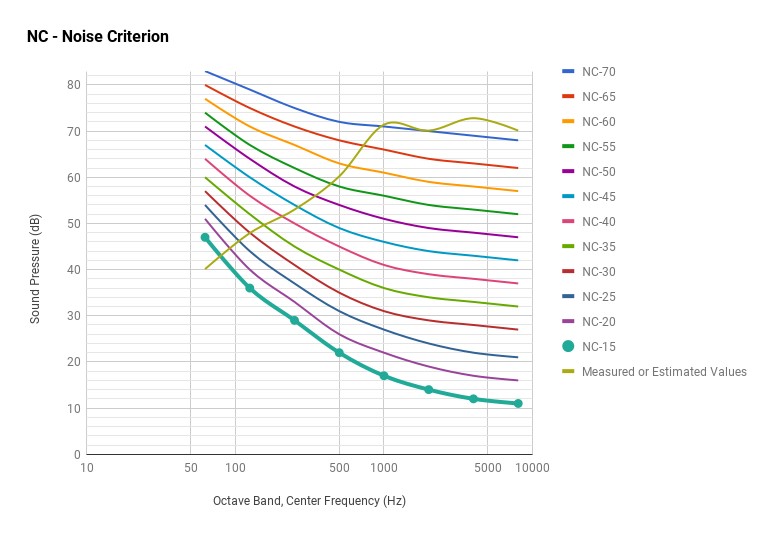


**Supplementary Figure 3: Graphical Representation for Octave Band Analysis at Unit 2 in Line with Standard NC Curves**


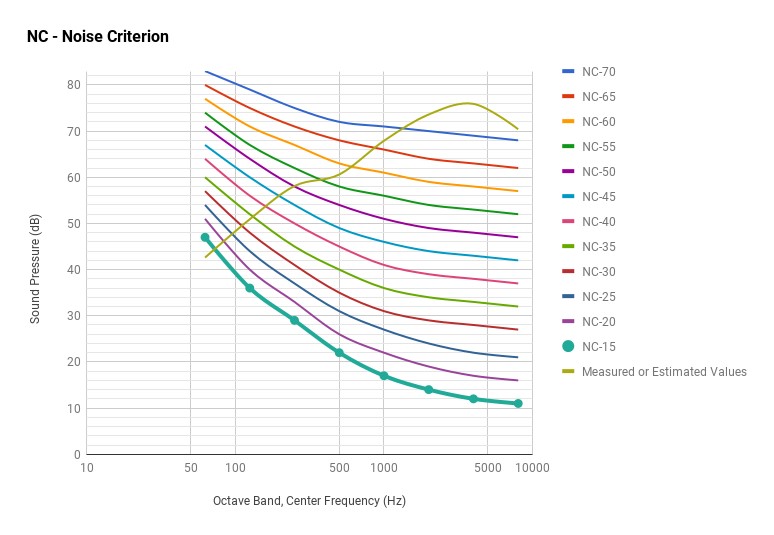


**Supplementary Figure 4: Graphical Representation for Octave Band Analysis at Unit 3 in Line with Standard NC Curves**

**
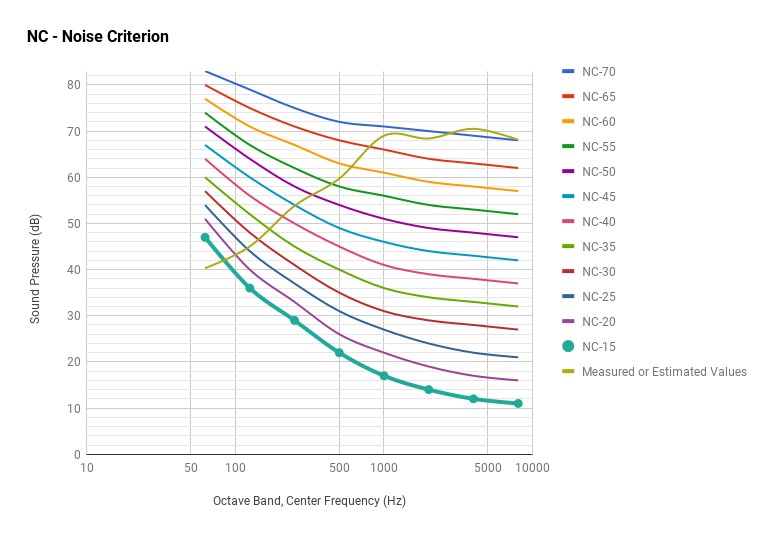
**

**Supplementary Figure 5: Graphical Representation for Octave Band Analysis at Unit 1 in Line with Standard NR Curves**


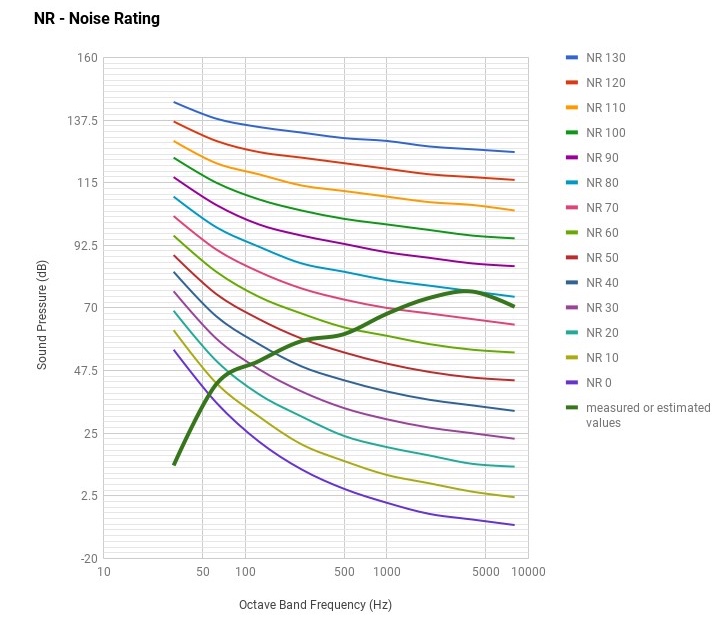


**Supplementary Figure 6: Graphical Representation for Octave Band Analysis at Unit 2 in Line with Standard NR Curves**


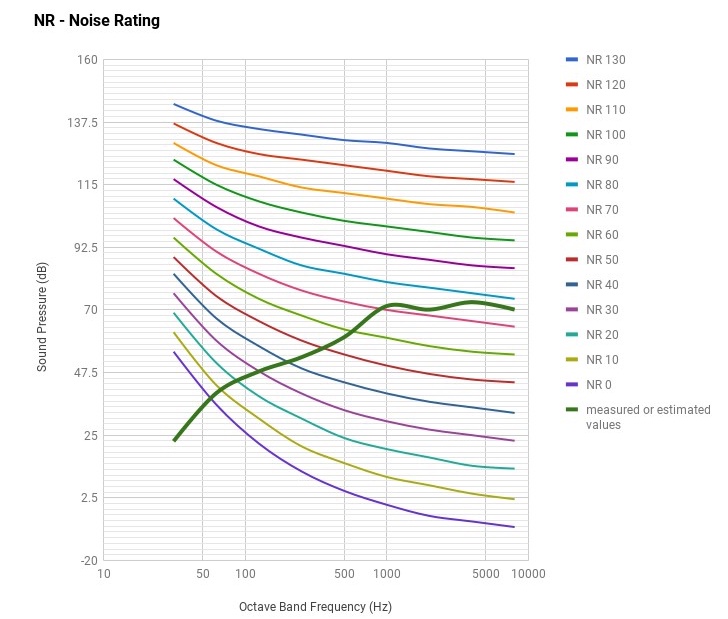


**Supplementary Figure 7: Graphical Representation for Octave Band Analysis at Unit 3 in Line with Standard NR Curves**


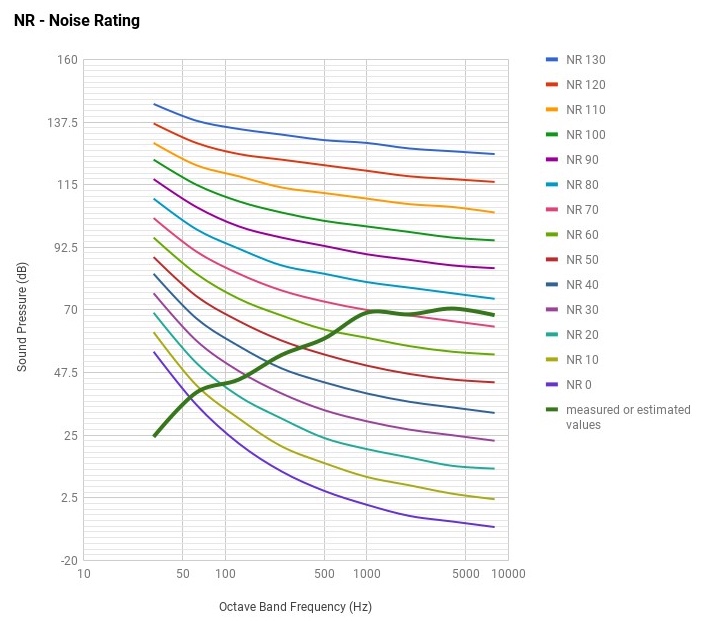


**Supplementary Figure 8: Musculoskeletal Pain in Copper Bell Makers (N=89)**

**Supplementary Figure 9: Self-Reported Symptoms in Different Work Profile of Copper Bell Makers (N=89)**

**Supplementary Table 1: Noise Dosimetry (N=9) at Bell Workshops**

| **No** | **Parameter for hammering activity** | **Measured/observed value/range** |
| --- | --- | --- |
| 1. | Lmin | 65.0 dB(A) |
| 2. | Lmax | 119.8 dB(A) |
| 3. | Lpeak | 148.2 dB(Z) |
| 4. | TWA | 79.08 ± 2.89 dB(A) |
